# Supplementary material for: Strain and defect engineered monolayer Ni-MoS2for pH-universal hydrogen evolution catalysis
Source: Royal Society of Chemistry journal article supplement (doi:10.1039/c9nr06541e), 2019-01-01
Supplement: c9nr06541e1.pdf [file c9nr06541e1.pdf]

# Strains and Defects Engineered Monolayer Ni-MoS<sub>2</sub> for pH-universal Hydrogen Evolution Catalysis

Dan Liang<sup>a,b</sup>, Yong-Wei Zhang<sup>b</sup>, Pengfei Lu<sup>a,\*</sup>, Zhi Gen Yu<sup>b,\*\*</sup>

<sup>a</sup>*State Key Laboratory of Information Photonics and Optical Communications, Beijing  
University of Posts and Telecommunications, Beijing 100876, China*

<sup>b</sup>*Institute of High Performance Computing, A\*STAR, Singapore 138632, Singapore*

\*To whom correspondence should be addressed. E-mail: [photon.bupt@gmail.com](mailto:photon.bupt@gmail.com)

\*\*To whom correspondence should be addressed. E-mail: [yuzg@ihpc.a-star.edu.sg](mailto:yuzg@ihpc.a-star.edu.sg)

## Supporting information

### **This file includes:**

Computational methods

Tables S1, S2 & S3

Figures S1, S2 & S3

References

## Computational methods

Our theoretical calculations were based on the density functional theory (DFT)<sup>1</sup> as implemented in the Vienna *ab-initio* Simulation Package (VASP).<sup>2,3</sup> We used the projector augmented wave method (PAW)<sup>4,5</sup> to represent electron-ion interactions, and the Perdew-Burke-Ernzerhof (PBE) functional within the generalized gradient approximation (GGA)<sup>6</sup> was considered for exchange correlation interactions. In addition, the vdW-DF2 method was used to describe the van der Waals interaction.<sup>7-10</sup> The energy cutoff for the plane-wave basis set was chosen to be 500 eV. The structures were relaxed until the forces on each atom were less than 0.01 eV/Å and the maximum energy change was of the order of 10<sup>-6</sup> eV. To prevent interaction between two neighboring surfaces, a vacuum slab of 15 Å was employed in *z*-direction. The spin-polarization was considered in this work. The energy barriers for Heyrovsky, Tafel mechanism and water dissociation were determined using climbing image nudged elastic band (NEB) calculations.<sup>11</sup> The Gibbs free energy ( $\Delta G_H$ ) of the basal planes for both perfect and S vacancy-contained Ni-MoS<sub>2</sub> was calculated using supercells containing 4×4 and 6×6 unit cells, respectively. The *k*-points for the first Brillouin zone were sampled on a mesh grid of 4×4×1 and 2×2×1 for 4×4 and 6×6 supercells, respectively. In order to determine the dynamic stability of Ni-MoS<sub>2</sub>, we calculated the phonon spectrum based on the force constant approach using the software package Phonopy.<sup>12</sup> Finite temperature analysis of the system at 1200K was conducted through *ab-initio* molecular dynamics (AIMD). The AIMD simulations were performed using 3000 time steps with a 0.5 fs time step at 1200 K. We employed non-self-consistent G<sub>0</sub>W<sub>0</sub> correction<sup>13</sup> for MoS<sub>2</sub> to calculate the bandgap, and compare the PBE and GW bandgap energies. G<sub>0</sub>W<sub>0</sub> correction accounts for the many-body electron interactions but retains the input PBE wave functions, thus results in the more accurate bandgap. A unified *k*-point mesh 12×12×1 is adopted for the G<sub>0</sub>W<sub>0</sub>.

The adsorption energy ( $\Delta E_H$ ) is computed as<sup>14</sup>

$$\Delta E_H = E(*H) - E(*) - \frac{1}{2}E(H_2) \quad (1)$$

where  $E(*H)$  and  $E(*)$  are the total energy of a supercell with and without hydrogen adsorption, respectively, and  $E(H_2)$  is the total energy of a H<sub>2</sub> molecule.

The Gibbs free energy of H ( $\Delta G_H$ ) is defined as:

$$\Delta G_H = \Delta E_H + \Delta E_{ZPE} - T\Delta S_H \quad (2)$$

where  $\Delta E_H$  is the adsorption energy,  $\Delta E_{ZPE}$  is the difference in zero-point energy, T is the temperature (300 K) and  $\Delta S_H$  is the entropy difference between H that is adsorbed and in the gas phase. We approximated the entropy of hydrogen adsorption as  $\Delta S_H \approx \frac{1}{2}(S_{H_2}^\circ)$ , where  $S_{H_2}^\circ$  is the entropy of gas phase  $H_2$  at standard conditions. Therefore, the correction factor of  $(\Delta E_{ZPE} - T\Delta S_H)$  was computed to be 0.223 eV in this study.

**Table S1.** Calculated values of lattice parameter ( $a$ ), bond length ( $d_{M-S}$ , M=Mo,Ni) for  $MoS_2$ ,  $NiS_2$ ,  $Ni-MoS_2$ , respectively, and formation energy ( $E_f$ ) of  $Ni-MoS_2$ .

|            | $a$ (Å)                    | $d_{M-S}$ (Å)                                 | $E_f$ (eV) |
|------------|----------------------------|-----------------------------------------------|------------|
| $MoS_2$    | 3.192, 3.160 <sup>15</sup> | 2.41, 2.42 <sup>15</sup>                      |            |
| $NiS_2$    | 3.54, 3.40 <sup>16</sup>   | 2.58, 2.24 <sup>16</sup>                      |            |
| $Ni-MoS_2$ | 3.351                      | 2.418 (Mo-S)<br>2.279 (Ni-S)<br>3.857 (*Ni-S) | -1.222     |

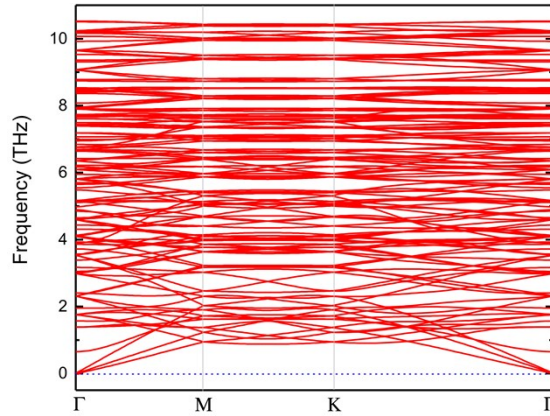

**Figure S1.** Calculated phonon-dispersion curves of  $Ni-MoS_2$  along major symmetry directions of the Brillouin zone.

**Table S2.** Mechanical properties of  $Ni-MoS_2$ ,  $MoS_2$  and  $NiS_2$  predicted by first-principles calculations.

|                           | Stiffness Tensor (N/m)                                                           | Young's Modulus (N/m)              | Shear Modulus (N/m) | Poisson's Ratio                    |
|---------------------------|----------------------------------------------------------------------------------|------------------------------------|---------------------|------------------------------------|
| <b>Ni-MoS<sub>2</sub></b> | $C_{11} = 93.545$<br>$C_{22} = 62.575$<br>$C_{12} = 16.019$<br>$C_{66} = 16.694$ | $Y_x = 89.444$<br>$Y_y = 59.832$   | $Y_y = 16.694$      | $\nu_x = 0.256$<br>$\nu_y = 0.171$ |
| <b>MoS<sub>2</sub></b>    | $C_{11} = 136.261$<br>$C_{22} = 136.260$                                         | $Y_x = 128.178$<br>$Y_y = 128.177$ | $Y_y = 51.754$      | $\nu_x = 0.244$<br>$\nu_y = 0.244$ |

|                        |                   |                |                |               |
|------------------------|-------------------|----------------|----------------|---------------|
|                        | $C_{12} = 33.188$ |                |                |               |
|                        | $C_{66} = 51.754$ |                |                |               |
| <b>NiS<sub>2</sub></b> | $C_{11} = 53.541$ | $Y_x = 39.805$ | $Y_y = 17.692$ | $v_x = 0.515$ |
|                        | $C_{22} = 51.852$ | $Y_y = 38.549$ |                | $v_y = 0.498$ |
|                        | $C_{12} = 26.688$ |                |                |               |
|                        | $C_{66} = 17.692$ |                |                |               |

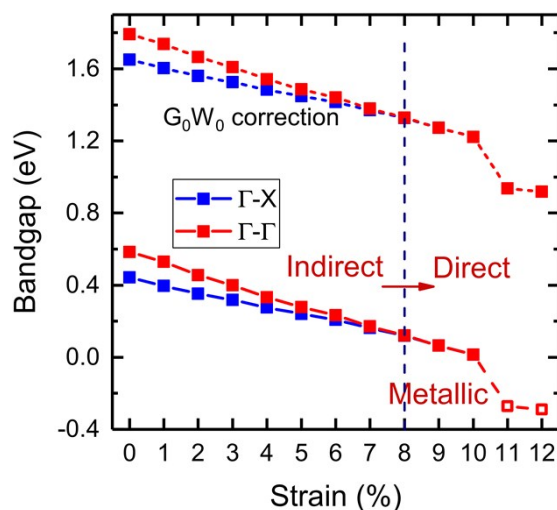

**Figure S2.** Evolution of the bandgap energy as a function of applied tensile strains (%) within PBE (solid lines) and  $G_0W_0$  correction (dashed lines).

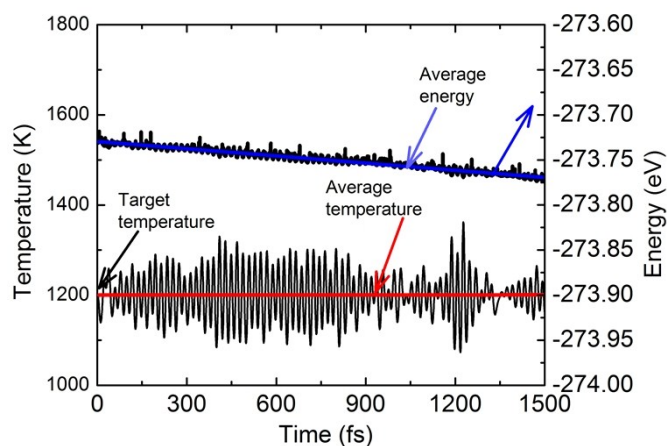

**Figure S3.** Variation of temperature and the total energy within 1500 fs during AIMD simulation around 1200 K for Ni-MoS<sub>2</sub>.

**Table S3.** Performance of MoS<sub>2</sub>, Pt(111) and Ni-MoS<sub>2</sub> catalysts for HER.

| Catalyst | $\Delta G_H$ (eV) | Optimal condition<br>( $\Delta G_H \approx 0$ eV) | Bandgap (eV) | Water dissociation<br>barrier (eV) |
|----------|-------------------|---------------------------------------------------|--------------|------------------------------------|
|----------|-------------------|---------------------------------------------------|--------------|------------------------------------|

|                     |                                             |                                                      |                          |                                        |
|---------------------|---------------------------------------------|------------------------------------------------------|--------------------------|----------------------------------------|
| MoS <sub>2</sub>    | 1.736<br>(present work)<br>~2 <sup>17</sup> | strain and S vacancy<br>simultaneously <sup>17</sup> | 1.87 (K-K) <sup>18</sup> | 3.2 <sup>19</sup>                      |
| Pt(111)             | ~0 <sup>20</sup>                            |                                                      | Metal                    | 1.07 <sup>21</sup>                     |
| Ni-MoS <sub>2</sub> | 0.545                                       | 11% strain or<br>2.5% S vacancy                      | 0.443 (Γ-X)              | 1.114 (perfect);<br>0.866 (defective); |

## References

- [1] W. Kohn, L. J. Sham, Phys. Rev., 1965, **140**, A1133-1138.
- [2] G. Kresse, J. Furthmüller, Phys. Rev. B, 1996, **54**, 11169-11186.
- [3] G. Kresse, J. Furthmüller, Comp. Mater. Sci., 1996, **6**, 15-50.
- [4] P. E. Blöchl, Phys. Rev. B, 1994, **50**, 17953-17979.
- [5] G. Kresse, D. Joubert, Phys. Rev. B, 1999, **59**, 1758-1775.
- [6] J. P. Perdew, K. Burke, M. Ernzerhof, Phys. Rev. Lett., 1996, **77**, 3865-3868.
- [7] M. Dion, H. Rydberg, E. Schröder, D. C. Langreth, B. I. Lundqvist, Phys. Rev. Lett., 2004, **92**, 246401-246405.
- [8] L. Kong, G. Román-Pérez, J. M. Soler, Phys. Rev. Lett., 2009, **103**, 096103-096107.
- [9] K. Lee, É. D. Murray, L. Kong, B. I. Lundqvist, D. C. Langreth, Phys. Rev. B, 2010, **82**, 081101-081105.
- [10] J. Klimeš, D. R. Bowler, A. Michaelides, Phys. Rev. B, 2011, **83**, 195131-195144.
- [11] G. Henkelman, B. P. Uberuaga, H. Jónsson, J. Chem. Phys., 2000, **113**, 9901-9904.
- [12] A. Togo, F. Oba, Isao. Tanaka, Phys. Rev. B, 2008, **78**, 134106-134115.
- [13] M. Shishkin, G. Kresse, Phys. Rev. B, 2006, **74**, 035101-035114.
- [14] J. K. Nørskov, T. Bligaard, A. Logadottir, J. R. Kitchin, J. G. Chen, S. Pandalov, U. Stimming, J. Electrochem. Soc., 2005, **152**, J23-26.
- [15] K. D. Bronsema, J. L. De Boer, F. Jellinek, Z. Anorg. Allg. Chem., 1986, **540**, 15-17.
- [16] C. Ataca, H. Şahin, S. Ciraci, J. Phys. Chem. C, 2012, **116**, 8983-8999.
- [17] H. Li, *et al.*, Nat. Mater., 2016, **15**, 48-53.
- [18] C. Ataca, H. Şahin, and S. Ciraci, J. Phys. Chem. C, 2012, **116**, 8983-8999.
- [19] B. Tang, *et al.*, J. Mater. Chem. A, 2019, **7**, 13339-13346.
- [20] J. Greeley, I. E. Stephens, A. S. Bondarenko, T. P. Johansson, H. A. Hansen, T. F. Jaramillo, J. Rossmeisl, I. Chorkendorff, J. K. Nørskov, Nat. Chem., 2009, **1**, 552-556.
- [21] J. L. Fajín, M. D. Cordeiro, J. R. Gomes, J. Phys. Chem. A, 2014, **118**, 5832-5840.
